# Supplementary material
Source: PubMed Central journal article supplement (PMC6058783)
Supplement: 2017_169516-Disclosures_and_Contributions.pdf [file 2017_169516-Disclosures_and_Contributions.pdf]

Haematologica  
HAEMATOL/2017/169516  
Version 5

Memory CD8+ T cells support the maintenance of hematopoietic stem cells in the bone marrow.

Sulima Geerman, Giso Brasser, Sudeep Bhushal, Fiamma Salerno, Natasja A. Kragten, Mark Hoogenboezem, Gerald de Haan, Monika C. Wolkers, María Fernanda Pascutti, and Martijn A. Nolte

Disclosures: none

Contributions: SG, GB SB, FS, NK, MH, MW and MFP conducted experiments; SG analyzed data; GH provided unique material; MFP and MAN supervised the project; SG and MAN designed experiments and wrote the manuscript.
